# Supplementary material for: Knowledge, attitudes and practices pertaining to urogenital schistosomiasis in Lambaréné and surrounding areas, Gabon
Source: PubMed Central journal article supplement (PMC8456596; doi:10.1186/s13071-021-04905-0), 2021-09-22
Supplement: 13071_2021_4905_MOESM1_ESM.pdf [file 13071_2021_4905_MOESM1_ESM.pdf]

**Numéro de participation à l'étude : SK-**|\_\_|\_\_|\_\_|

**Initiales** |\_\_|\_\_|\_\_|

## **Schistosomiase: Connaissance, Attitude et Pratiques des Populations de Lambaréné et ses Environs**

**Acronyme:** SchistoKAP

Version 1.3\_16.06.2019

**Questionnaire Adulte**



**Conditions de vie****Q1.11-Quelle est la principale source d'eau pour vos activités quotidiennes à la maison?**

1.  SEEG,                      2.  Rivière,                      3.  Puits,  
 4.  Autre, précisez: -----

**Q1.12-Estimez-vous que votre maison est située à proximité d'un point d'eau: lac, rivière, ruisseau, marais?**

1.  Oui,                                      2.  Non

**Q1.13-Si "Oui", veuillez spécifier le type de cours d'eau**

1.  Lac,                                      2.  Rivière,                                      3.  Ruisseau,                                      4.  Marais

**Q1.14-Quelle est la source d'eau pour vos activités quotidiennes à l'école ou au lieu de travail?**

1.  SEEG,                                      2.  Rivière,                                      3.  Puits,  
 5.  Autre précisez: -----

**Q1.15-Estimez-vous que votre école ou lieu de travail est situé à proximité d'un cours d'eau: lac, rivière, ruisseau, marais?**

1.  Oui,                                      2.  Non

**Q1.16- Si "Oui", veuillez spécifier le type de cours d'eau**

1.  Lac,                                      2.  Rivière,                                      3.  Ruisseau,                                      4.  Marais

**Q1.17-Combien de personnes êtes-vous dans votre maison? ----- personnes****Environnement sanitaire****Q1.18-Quel type de sanitaire (toilettes, latrine) utilisez-vous chez vous?**

1.  Interne (privé),                                      2.  Latrine commune,                                      3.  Latrine traditionnelle  
 4.  Dans la broussaille,                                      5.  Nous n'avons pas de latrine dans notre maison

**Q1.19-Quel type de sanitaire (toilettes, latrine) utilisez-vous à l'école ou à votre lieu de travail?**

1.  Interne (privé),                                      2.  Latrine commune,                                      3.  Latrine traditionnelle  
 4.  Dans la broussaille,                                      5.  Il n'y a pas de latrine dans mon école / lieu de travail

**Q2. ÉVALUATION DE LA CONNAISSANCE SUR LA BILHARZIOSE****Connaissance sur la définition de la schistosomiase****Q2.1-Avez-vous déjà entendu parler de la bilharziose**

1.  Oui, pouvez-vous nous dire en termes simples ce qu'est la bilharziose? \_ \_ \_ \_ \_  
 -----  
 2.  Non (= > Allez à la question Q3.5)

**Q2.2-Si "Oui", où avez-vous entendu parler de la bilharziose pour la première fois?**

1.  À l'école  
 2.  À travers un parent, un ami ou un collègue (bouche à oreille)  
 3.  À la télévision ou à la radio  
 4.  À travers un prospectus  
 5.  Lors d'une campagne de santé  
 6.  À l'hôpital  
 7.  À travers le laboratoire de recherche (CERMEL)  
 8.  Autre: \_ \_ \_ \_ \_

**Q2.3-Si "Oui", connaissez-vous un nom local donné à la bilharziose?**

1.  Oui, lequel: \_ \_ \_ \_ \_  
 2.  Non

**Q2.4-Si "Oui", pensez-vous que la bilharziose est une maladie?**

1.  Oui,                      2.  Non,                      3.  Je ne sais pas

**Q2.5-Si vous pensez que la bilharziose est une maladie, pensez-vous que c'est une maladie grave?**

1.  Oui,                      2.  Non

**Q2.6-Si "Oui", quel est l'agent causal de la bilharziose (le germe responsable de la bilharzie)?**

1.  Un virus  
 2.  Un ver  
 3.  Une bactérie  
 4.  Autre : \_ \_ \_ \_ \_  
 5.  Je ne sais pas

**Connaissance sur le diagnostic de la schistosomiase****Q2.7-Pour vous, quels sont les signes qui montrent que quelqu'un est atteint de bilharziose?**

- 1.- \_ \_ \_ \_ \_  
 2.- \_ \_ \_ \_ \_  
 3.  Je ne sais pas

**Q2.8-Selon vous, comment savez-vous que quelqu'un est atteint de bilharziose?**

1.  Quand il a de la fièvre  
 2.  Quand il fait la diarrhée  
 3.  Quand il a mal au ventre  
 4.  Quand il pisse du sang  
 5.  Quand il a des démangeaisons  
 6.  Je ne sais pas  
 7.  Autre: \_ \_ \_ \_ \_  
 -----

**Q2.9-Savez-vous s'il existe un test à l'hôpital pour rechercher la bilharziose chez un individu?**

1.  Oui,                      2.  Non  
 Si oui, lequel? \_ \_ \_ \_ \_

**Connaissance sur la prévention de la schistosomiase****Q2.10-Comment une personne peut-elle se protéger de la bilharziose?**

1.  Eviter d'uriner dans la rivière
2.  Éviter de faire des selles dans la rivière
3.  Eviter d'aller à la rivière
4.  Éviter de marcher pieds nus
5.  Dormir sous la moustiquaire
6.  Autre, pouvez-vous donner des détails svp: \_\_\_\_\_  
\_\_\_\_\_

**Connaissance sur la transmission de la schistosomiase****Q2.11-Comment peut-on contracter la bilharziose?**

1.  En Marchant pieds nus
2.  En mangeant sans se laver les mains
3.  En allant à la rivière
4.  En buvant l'eau de la rivière
5.  Quand on est piqué par les moustiques
6.  Pendant les rapports sexuels avec une personne atteinte de bilharziose
7.  Je ne sais pas
8.  Autre, spécifiez \_\_\_\_\_  
\_\_\_\_\_

**Q2.12-Pensez-vous que la bilharziose est contagieuse?**

1.  Oui,
2.  Non
3.  Voulez-vous commenter votre réponse? \_\_\_\_\_  
\_\_\_\_\_

**Q2.13-Connaissez-vous l'animal qui transmet la bilharziose?**

1.  Je ne sais pas
2.  Le moustique
3.  Le grand escargot terrestre
4.  Le petit escargot de rivière
5.  La mouche
6.  Autre, précisez \_\_\_\_\_  
\_\_\_\_\_

**Connaissance sur traitement de la schistosomiase****Q2.14-Pensez-vous que la bilharziose peut guérir sans traitement?**

1.  Oui,
2.  Non

**Q2.15-Pensez-vous qu'il existe un médicament pour traiter la bilharziose?**

1.  Oui,
2.  Non

**Q2.16-Connaissez-vous un traitement traditionnel de la bilharziose?**

1.  Oui,
2.  Non

**Q2.17-Si oui, pensez-vous que ce traitement traditionnel est efficace, que ça traite vraiment?**

1.  Oui,
2.  Non

**Q2.18-Selon vous, comment pouvez-vous savoir qu'une personne est guérie de la bilharziose? \_**

-----  
-----

**Q2.19-Avez-vous des commentaires sur le traitement de la bilharziose? \_**

-----  
-----

**Q3. EVALUATION DE L'ATTITUDE DE LA POPULATION SUR LA BILHARZIE***Perception de la maladie***Q3.1-Pensez-vous que nous devrions avoir honte d'avoir la bilharziose?**

1.  Oui,
2.  Non,
3.  Pouvez-vous expliquer votre réponse? \_\_\_\_\_  
 \_\_\_\_\_  
 \_\_\_\_\_

**Q3.2-Selon vous, la bilharziose est une maladie qui attaque:**

1.  Les enfants
2.  Les femmes
3.  Les hommes
4.  Les pauvres
5.  Les gens riches
6.  Les personnes faibles
7.  Avez-vous un commentaire sur cette question? \_\_\_\_\_  
 \_\_\_\_\_

**Q3.3-Pensez-vous que la bilharziose peut causer?**

1.  L'anémie
2.  La stérilité (infertilité)
3.  Le cancer de la vessie
4.  Les pertes vaginales malodorantes chez les femmes
5.  Les pertes vaginales malodorantes chez la petite fille
6.  La mort
7.  Autre, précisez: \_\_\_\_\_  
 \_\_\_\_\_

**Q3.4-A quel niveau de gravité classez-vous la bilharziose? (Encerclez une réponse)**

0                      1                      2                      3                      4                      5

(Pas grave du tout) (Très grave)

**Q3.5-Si vous pensez que vous avez la bilharziose, iriez-vous chercher des soins:**

1.  À l'hôpital?
2.  À la pharmacie?
3.  Chez un guérisseur traditionnel?
4.  Personne, je n'irai pas consulter
5.  Avez-vous un autre commentaire sur cette question? \_\_\_\_\_  
 \_\_\_\_\_  
 \_\_\_\_\_

**Q3.6-Informeriez-vous vos proches si vous avez la bilharziose?**

1.  Oui,
2.  Non,
3.  Pouvez-vous argumenter votre réponse? \_\_\_\_\_  
 \_\_\_\_\_  
 \_\_\_\_\_

**Q4. ÉVALUATION DES PRATIQUES PAR RAPPORT À LA BILHARZIE***Pratiques relatives à l'exposition à la bilharziose***Q4.1-Avez-vous été en contact avec un cours d'eau (lac, rivière, ruisseau, marais, etc.)?**

- 1.
- 
- Oui,                      2.
- 
- Non (=> Allez à la question Q5.1)

**Q4.2-Si "Oui", de quel type de cours d'eau s'est-il agi ?**

- 1.
- 
- Lac,                      2.
- 
- Rivière,   3.
- 
- Ruisseau, 4.
- 
- Autre .....

**Q4.3-Si "Oui", où avez-vous été en contact avec le cours d'eau?**

- 1.
- 
- À la maison,       2.
- 
- À l'école /lieu de travail,   3.
- 
- À la plantation
- 
- 4.
- 
- Autre : -----

**Q4.4-Si "Oui", à quelle fréquence?**

- 1.
- 
- Tous les jours,    2.
- 
- Toutes les semaines,    3.
- 
- Quelques fois par mois

**Q4.5-Si "Oui", quand y êtes-vous allé pour la dernière fois? |\_|\_|\_||\_|\_|\_|\_|\_20\_|\_|\_|\_**                                **Journal                      mois                      Année****Q4.6-Si "Oui", quelles sont les raisons pour lesquelles vous avez été (ou vous êtes) en contact avec le cours d'eau?**

- 1.
- 
- Pour les travaux ménagers (vaisselle, lessive...)
- 
- 2.
- 
- Pour puiser de l'eau
- 
- 3.
- 
- Pour prendre un bain
- 
- 4.
- 
- Pour jouer
- 
- 5.
- 
- Pour pêcher
- 
- 6.
- 
- Pour mes activités agricoles
- 
- 7.
- 
- Autre, précisez: -----

**Q4.7-Si "Oui", à quelle heure de la journée partez-vous habituellement au cours d'eau?**

- 1.
- 
- Le matin
- 
- 2.
- 
- Entre 12 heures et 15 heures
- 
- 3.
- 
- Dans l'après-midi, à partir de 15 heures à 18 heures
- 
- 4.
- 
- Le soir ou la nuit
- 
- 5.
- 
- Je n'ai pas d'heures précises pour aller à la rivière

**Q4.8- Si "Oui", avez-vous déjà uriné dans ce (ou un autre) cours d'eau?**

- 1.
- 
- Oui,                      2.
- 
- Non

**Q4.9- Si "Oui", avez-vous déjà fait les selles dans ce (ou un autre) cours d'eau?**

- 1.
- 
- Oui,                      2.
- 
- Non

*Pratiques relatives à la protection contre la schistosomiase***Q4.10-Quelle est votre pratique quotidienne pour éviter d'avoir la bilharziose? -----***Pratiques concernant le traitement de la schistosomiase***Q4.11-Si vous êtes traité pour la bilharziose, pourriez-vous éviter d'aller à la rivière pour ne pas avoir à nouveau la bilharziose?**

- 1.
- 
- Oui
- 
- 2.
- 
- Non
- 
- 3.
- 
- Pouvez-vous argumenter votre réponse? -----

**Q5. EVALUATION CLINIQUE****Q5.1-Avez-vous déjà eu du sang dans les selles?**

1.  Oui,                      2.  Non

**Q5.2-Avez-vous déjà uriné avec du sang?**

1.  Oui,                      2.  Non (=> Allez à la question Q5.4)

**Q5.3-Si "Oui", quand avez-vous uriné avec du sang la dernière fois?**

1.  Cette semaine  
 2.  Ce mois-ci  
 3.  Le mois dernier  
 4.  Pendant l'année  
 5.  Plus d'un an  
 6.  Je ne me rappelle pas

**Q5.4-Avez-vous déjà eu la bilharziose?**

1.  Oui, pouvez-vous dire quand? \_\_\_\_\_ (jour) \_\_\_\_\_ (mois) \_\_\_\_\_ (années)  
 2.  Non (=> Allez à la question Q5.6)

**Q5.5-Si "Oui", comment avez-vous su que vous aviez la bilharziose? \_\_\_\_\_****Q5.6-Avez-vous déjà reçu le médicament de la bilharziose?**

(Présentez une copie du médicament au volontaire, s'il vous plaît)

1.  Oui,                      2.  Non (=> Allez à la question Q5.9)

**Q5.7-Si "Oui", vous souvenez-vous quand? \_\_\_\_\_ (jour) \_\_\_\_\_ (mois) \_\_\_\_\_ (années)****Q5.8-Si "Oui", comment êtes-vous entré en possession du médicament?**

1.  Je l'ai acheté à la pharmacie  
 2.  Je l'ai reçu du laboratoire de recherche (CERMEL)  
 3.  Je l'ai reçu lors de campagnes de traitement de masse (programme national)  
 4.  Je l'ai reçu dans un centre de santé / à l'hôpital  
 5.  Je l'ai reçu d'un parent  
 6.  Autre, précisez: \_\_\_\_\_  
 \_\_\_\_\_  
 \_\_\_\_\_

**Q5.9-Que pensez-vous du médicament de la bilharziose? \_\_\_\_\_**

*Merci d'avoir pris le temps de répondre à ce questionnaire. Nous espérons que les informations que vous nous avez fournies contribueront à un meilleur contrôle de la bilharziose dans notre localité.*

***L'équipe de recherche***

Date du jour : |\_\_|\_| |\_\_|\_|\_|\_| 2019

Initiales intervieweur : |\_\_|\_|\_|\_|
