# Supplementary material for: Knowledge, attitudes and practices pertaining to urogenital schistosomiasis in Lambaréné and surrounding areas, Gabon
Source: PubMed Central journal article supplement (PMC8456596; doi:10.1186/s13071-021-04905-0), 2021-09-22
Supplement: 13071_2021_4905_MOESM2_ESM.pdf [file 13071_2021_4905_MOESM2_ESM.pdf]

Numéro de participation à l'Etude: SK- |\_\_| |\_\_| |\_\_| |

Initiales |\_\_| |\_\_| |\_\_| |\_\_| |

## Schistosomiase : Connaissance, Attitude et Pratiques des populations de Lambaréné et de ses Environs

Acronyme : SchistoKAP

Version 1.2\_04.06.2019

### Questionnaire Enfant

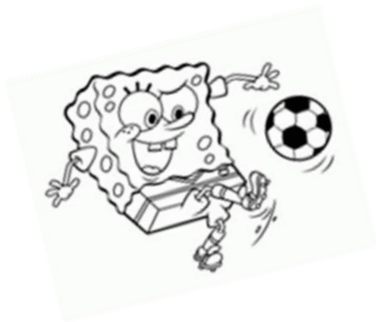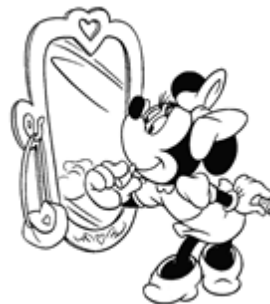

## Consentement volontaire à participer à l'étude

**Le volontaire a-t-il donné son accord oral de participer à l'étude ?**

1.  Oui,                      2.  Non (Ne pas procéder au questionnaire svp)

**Le parent ou tuteur responsable l'enfant a-t-il signé le formulaire de consentement éclairé ?**

1.  Oui,                      2.  Non (Ne pas procéder au questionnaire svp)

## Q1. Identification et données sociodémographiques

### Données démographiques

Q1.1- Quel âge as-tu ? \_ \_ \_ ans

Q1.2- Quand est-ce que tu fêtes ton anniversaire ? | \_ \_ | | \_ \_ | | \_ \_ | | \_ \_ |

Q1.3- Es-tu ;

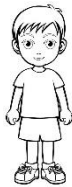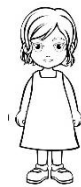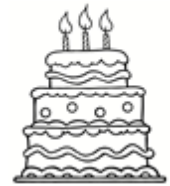

1.  Un garçon ?      2.  Une fille ?

Q1.4- Quel est le nom de ton quartier ? -----

Q1.7- Quel quartier habitais-tu avant ? -----

1.  Zone rurale                      2.  Zone urbaine                      3.  Zone semi-urbaine

### Données socio-économiques

Q1.8- Où vas-tu à l'école ?

1.  Je ne vais pas à l'école      2.  A l'école primaire      3.  Au lycée

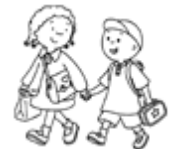

Q1.8a- Si tu vas à l'école, comment s'appelle ton école ? -----

Q1.8b- Et quelle classe fais-tu ? -----

### Conditions de vie

Q1.11- Quelle eau utilisez-vous à la maison ?

1.  L'eau de la SEEG      2.  L'eau de la rivière      3.  L'eau du puit

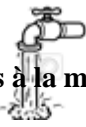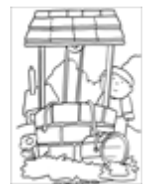

Q1.12- Penses-tu que votre maison est proche d'un point d'eau ?

1.  Oui                      2.  Non

Q1.13- Si oui, s'agit-il :

1.  D'un lac ?                      2.  D'une rivière ?                      3.  D'un marigot ?

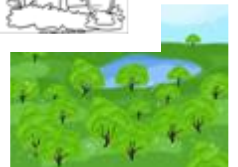

Q1.14- Quelle eau utilises-tu à l'école ?

1.  L'eau de la SEEG      2.  L'eau de la rivière      3.  L'eau du puit

Q1.15- Penses-tu que ton école est proche d'un point d'eau ?

1.  Oui                      2.  Non

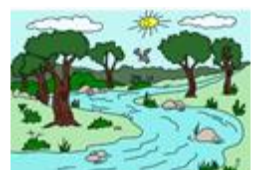

Q1.16- Si oui, s'agit-il :

1.  D'un lac ?                      2.  D'une rivière ?                      3.  D'un marigot ?

**Environnement sanitaire**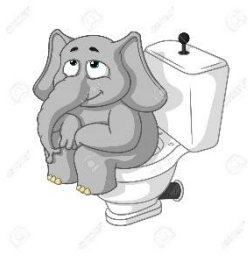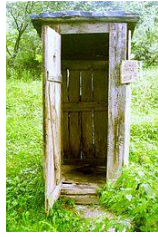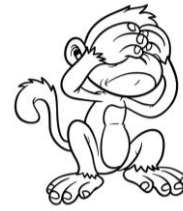**Q1.18- Quel type de toilettes utilisez-vous à la maison ?**

1.  Moderne                      3.  Traditionnelles                      5.  Nous n'avons pas de toilette à la maison

**Q1.19- Quel type de toilettes utilises-tu à l'école ?**

1.  Moderne                      3.  Traditionnelles                      5.  Nous n'avons pas de toilette à l'école

**Q2. Evaluation de la connaissance sur la Bilharzie****Q2.1- As-tu déjà entendu parler de la bilharzie ?**

1.  Oui                      2.  Non (= > Allez à la question Q3.6)

**Q2.2- Si oui, où as-tu entendu parler de la bilharzie pour la première fois ?**

1.  A l'école  
2.  A la maison (Parent, famille)  
8.  Autre, précisez \_\_\_\_\_

**Q2.20- Si oui, sais-tu quand quelqu'un est malade de la bilharzie ?**

1.  Oui, comment ? \_\_\_\_\_  
2.  Non

**Q2.21- Si oui, sais-tu où est ce qu'on attrape la bilharzie ?**

1.  Oui, où ? \_\_\_\_\_  
2.  Non

**Q2.22- Si oui, que peux-tu faire pour éviter la bilharzie ? \_\_\_\_\_**

-----

**Q3. Evaluation de l'attitude vis-à-vis de la bilharzie****Q3.6- S'il t'arrive de pisser du sang, le diras-tu aux autres?**

1.  Oui                      2.  Non

**Q3.6a- S'il t'arrive de pisser du sang, à qui le diras-tu ?**

1.  A mes parents  
2.  A mon enseignant (e)  
3.  A mes amis

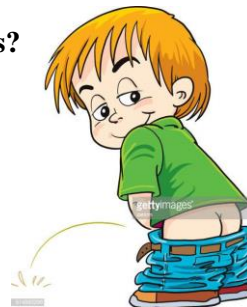

## Q4. Evaluation des pratiques vis-à-vis de la bilharzie

**Q4.1- Vas-tu souvent à l'eau ?**

1.  Oui                      2.  Non (=> Allez à la question Q5.1)

**Q4.2- Si oui, s'agit-il :**

1.  D'un lac ?              2.  D'une rivière ?      3.  D'un marigot ?

**Q4.3- Si oui, d'où est-ce que tu pars le plus souvent pour le point d'eau ?**

1.  De la maison      2.  A l'école              4.  Autre, -----

**Q4.4- Si oui, combien de fois vas-tu au point d'eau ?**

1.  Tous les jours      2.  Parfois (De temps en temps)

**Q4.6- Si oui, pourquoi vas-tu à ce point d'eau ?**

1.  Pour laver le linge ou faire la vaisselle  
 2.  Pour puiser de l'eau  
 3.  Pour me baigner  
 4.  Pour jouer avec mes amis  
 5.  Pour la pêche  
 6.  Pendant les travaux champêtres

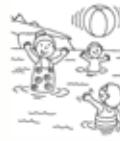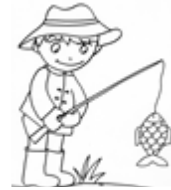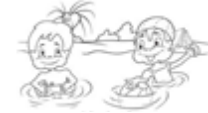

**Q4.7- Si oui, à quel moment de la journée tu y vas le plus souvent ?**

1.  En matinée              3.  En après-midi      5.  Je n'ai pas d'heure pour aller à la rivière

**Q4.8- Si oui, as-tu déjà uriné dans ce point d'eau quand tu y vas ?**

1.  Oui                      2.  Non

**Q4.9- Si oui, as-tu déjà fait caca dans ce point d'eau quand tu y vas ?**

1.  Oui                      2.  Non

## Q5. Clinique

**Q5.1- As-tu déjà cabiné du sang ?**

1.  Oui                      2.  Non

**Q5.2- As-tu déjà pissé du sang ?**

1.  Oui                      2.  Non

**Q5.4- On t'a déjà dit que tu as la bilharzie ?**

1.  Oui                      2.  Non (=> Allez à la question Q5.6)

**Q5.5- Si oui, qui te l'a dit ?**

1.  Mes parents      2.  A l'hôpital      3.  Mes amis      4.  Autre, -----

**Q5.6- As-tu déjà reçu le médicament de la Bilharzie ?**

1.  Oui                      2.  Non

**Q5.8- Si oui, où as-tu reçu ce médicament ?**

2.  Au CERMEL      3.  A l'école              4.  A l'hôpital      5.  A la maison par mes parents

*Nous te remercions pour ta participation à cette étude. Les réponses que tu viens de nous donner vont nous aider à mieux réfléchir sur comment te protéger, toi, ta famille et tes amis contre la bilharzie.*

*L'équipe de recherche*

Date du jour : |\_\_| |\_\_| |\_\_| 2019

Initiales intervieweur |\_\_| |\_\_|
