# Supplementary material for: Knowledge, attitudes and practices pertaining to urogenital schistosomiasis in Lambaréné and surrounding areas, Gabon
Source: PubMed Central journal article supplement (PMC8456596; doi:10.1186/s13071-021-04905-0), 2021-09-22
Supplement: 13071_2021_4905_MOESM3_ESM.pdf [file 13071_2021_4905_MOESM3_ESM.pdf]

**Knowledge, attitudes and practices pertaining to urogenital schistosomiasis in  
Lambaréné and surrounding areas, Gabon**

**Table S1:** Description of the scoring of each question and total score for knowledge, attitudes and practices calculated for the participants interviewed during the surveys

| Question reference number <sup>s</sup> | Answer                                                                  | Mark per answer | Maximum score for |          |
|----------------------------------------|-------------------------------------------------------------------------|-----------------|-------------------|----------|
|                                        |                                                                         |                 | Adults            | Children |
| <b>Knowledge</b>                       |                                                                         |                 |                   |          |
| Q2.1                                   | Oui                                                                     | +1              | 1                 | 1        |
|                                        | Non                                                                     | +0              |                   |          |
| Q2.4                                   | Oui                                                                     | +1              | 1                 | NA       |
|                                        | Non                                                                     | +0              |                   |          |
| Q2.6                                   | Un virus                                                                | 0+              | 1                 | NA       |
|                                        | Un ver                                                                  | +1              |                   |          |
|                                        | Une bactérie                                                            | +0              |                   |          |
|                                        | Autre                                                                   | +0              |                   |          |
|                                        | Je ne sais pas                                                          | +0              |                   |          |
| Q2.8                                   | Quand il a de la fièvre                                                 | +0              | 1                 | NA       |
|                                        | Quand il fait la diarrhée                                               | +0              |                   |          |
|                                        | Quand il a mal au ventre                                                | +0              |                   |          |
|                                        | Quand il pisse du sang                                                  | +1              |                   |          |
|                                        | Quand il a des démangeaisons                                            | +0              |                   |          |
|                                        | Je ne sais pas                                                          | +0              |                   |          |
|                                        | Autre                                                                   | +0              |                   |          |
| Q2.9                                   | Oui                                                                     | +1              | 1                 | NA       |
|                                        | Non                                                                     | +0              |                   |          |
| Q2.10                                  | Eviter d'uriner dans la rivière                                         | +1              | 3                 | NA       |
|                                        | Eviter de faire des selles dans la rivière                              | +1              |                   |          |
|                                        | Eviter d'aller à la rivière                                             | +1              |                   |          |
|                                        | Eviter de marcher pieds nus                                             | +0              |                   |          |
|                                        | Dormir sous la moustiquaire                                             | +0              |                   |          |
|                                        | Autre                                                                   | +0              |                   |          |
| Q2.11                                  | En marchant pieds nus                                                   | +0              | 1                 | NA       |
|                                        | En mangeant sans se laver les mains                                     | +0              |                   |          |
|                                        | En allant à la rivière                                                  | +1              |                   |          |
|                                        | En buvant l'eau de la rivière                                           | +0              |                   |          |
|                                        | Quand on est piqué par les moustiques                                   | +0              |                   |          |
|                                        | Pendant les rapports sexuels avec une personne atteinte de la bilharzie | +0              |                   |          |
|                                        | Je ne sais pas                                                          | +0              |                   |          |
|                                        | Autre                                                                   | +0              |                   |          |
| Q2.12                                  | Oui                                                                     | +0              | 1                 | NA       |
|                                        | Non                                                                     | +1              |                   |          |
| Q2.13                                  | Je ne sais pas                                                          | +0              | 1                 | NA       |
|                                        | Le moustique                                                            | +0              |                   |          |
|                                        | Le grand escargot terrestre                                             | +0              |                   |          |
|                                        | Le petit escargot de rivière                                            | +1              |                   |          |
|                                        | La mouche                                                               | +0              |                   |          |
|                                        | Autre                                                                   | +0              |                   |          |
| Q2.14                                  | Oui                                                                     | +0              | 1                 | NA       |
|                                        | Non                                                                     | +1              |                   |          |
| Q2.15                                  | Oui                                                                     | +1              | 1                 | NA       |
|                                        | Non                                                                     | +0              |                   |          |
| <b>Total score for knowledge</b>       |                                                                         |                 | <b>13</b>         | <b>1</b> |

| <b>Attitudes</b>                 |                                   |    |          |          |
|----------------------------------|-----------------------------------|----|----------|----------|
| Q3.1                             | Oui                               | +0 | 1        | NA       |
|                                  | Non                               | +1 |          |          |
| Q3.5                             | A l'hôpital ?                     | +1 | 2        | NA       |
|                                  | A la pharmacie ?                  | +1 |          |          |
|                                  | Chez un guérisseur traditionnel ? | +0 |          |          |
|                                  | Personne, je n'irai pas consulter | +0 |          |          |
| Q3.6                             | Oui                               | +1 | 1        | 1        |
|                                  | Non                               | +0 |          |          |
| <b>Total score for attitudes</b> |                                   |    | <b>4</b> | <b>1</b> |

| <b>Practices</b>                                     |                                                      |    |          |           |
|------------------------------------------------------|------------------------------------------------------|----|----------|-----------|
| Q4.1                                                 | Oui                                                  | +1 | 1        | 1         |
|                                                      | Non                                                  | +0 |          |           |
| Q4.4                                                 | Tous les jours                                       | +3 | 3        | 3         |
|                                                      | Toutes les semaines                                  | +2 |          |           |
|                                                      | Quelques fois par mois                               | +1 |          |           |
| Q4.7                                                 | Le matin                                             | +0 | 1        | 1         |
|                                                      | Entre 12 heures et 15 heures                         | +1 |          |           |
|                                                      | Dans l'après-midi, à partir de 15 heures à 18 heures | +1 |          |           |
|                                                      | Le soir ou la nuit                                   | +0 |          |           |
|                                                      | Je n'ai pas d'heure précises pour aller à la rivière | +1 |          |           |
| Q4.8                                                 | Oui                                                  | +2 | 2        | 2         |
|                                                      | Non                                                  | +0 |          |           |
| Q4.9                                                 | Oui                                                  | +1 | 1        | 1         |
|                                                      | Non                                                  | +0 |          |           |
| Q4.11                                                | Oui                                                  | +1 | 1        | NA        |
|                                                      | Non                                                  | +0 |          |           |
| Children sub-total score for risk enhanced practices |                                                      |    | -        | 8         |
| <b>Total score for risk enhanced practices</b>       |                                                      |    | <b>9</b> | <b>9*</b> |

<sup>§</sup>Reference number of the question in the adults and children questionnaires

\*To harmonise the score between adults and children particularly for multivariate analysis, the total score of children was obtained by multiplying the sub-total score by eight and divided by nine

NA: Not Applicable
