# Supplementary material for: Knowledge, attitudes and practices pertaining to urogenital schistosomiasis in Lambaréné and surrounding areas, Gabon
Source: PubMed Central journal article supplement (PMC8456596; doi:10.1186/s13071-021-04905-0), 2021-09-22
Supplement: 13071_2021_4905_MOESM4_ESM.pdf [file 13071_2021_4905_MOESM4_ESM.pdf]

**Additional File 4 – Table S2.** Factors associated with appropriate knowledge and risk-enhancing practices of the study population towards schistosomiasis.

| Variable   | Correct knowledge score* |                     |                   |             |                                |                   |             | Risk-enhancing practices score |                     |                   |             |                   |                   |             |
|------------|--------------------------|---------------------|-------------------|-------------|--------------------------------|-------------------|-------------|--------------------------------|---------------------|-------------------|-------------|-------------------|-------------------|-------------|
|            | Mean                     | Unadjusted analysis |                   |             | Adjusted analysis <sup>b</sup> |                   |             | Mean                           | Unadjusted analysis |                   |             | Adjusted analysis |                   |             |
|            |                          | $\alpha$            | 95%CI( $\alpha$ ) | $p$         | $\alpha$                       | 95%CI( $\alpha$ ) | $p$         |                                | $\alpha$            | 95%CI( $\alpha$ ) | $p$         | $\alpha$          | 95%CI( $\alpha$ ) | $p$         |
| <b>Age</b> |                          |                     |                   | <b>0.74</b> |                                |                   | <b>0.52</b> |                                |                     |                   | <b>0.09</b> |                   |                   | <b>0.25</b> |
| 6 – 9      | -                        | -                   | -                 | -           | -                              | -                 | 5.23        | Ref                            | -                   | -                 | -           | -                 | -                 | -           |
| 10 – 13    | -                        | -                   | -                 | -           | -                              | -                 | 5.24        | 0.01                           | -0.58 – 0.59        | 0.99              | -           | -                 | -                 | -           |
| 14 – 17    | 8.74                     | Ref                 |                   |             | Ref                            |                   | 6.00        | 0.77                           | 0.13 – 1.41         | 0.02              | Ref         |                   |                   |             |
| 18 – 25    | 8.97                     | 0.23                | -0.59 – 1.04      | 0.59        | 0.36                           | -0.47 – 1.19      | 0.40        | 5.33                           | 0.10                | -0.52 – 0.72      | 0.76        | -0.56             | -1.25 – 0.12      | 0.10        |
| >25        | 8.75                     | 0.01                | -0.76 – 0.77      | 0.99        | 0.53                           | -0.42 – 1.48      | 0.27        | 5.24                           | 0.01                | -0.55 – 0.56      | 0.99        | -0.43             | -1.21 – 0.36      | 0.29        |

| <b>Gender</b>                     |      |       |             |                  |       |             |                  |      |      |             |                  |             |             |                  |             |
|-----------------------------------|------|-------|-------------|------------------|-------|-------------|------------------|------|------|-------------|------------------|-------------|-------------|------------------|-------------|
| Female                            | 8.83 | Ref   |             |                  | Ref   |             |                  | 5.28 | Ref  |             |                  | Ref         |             |                  |             |
| Male                              | 8.79 | -0.04 | -0.60 –     | 0.88             | -0.13 | -0.69 –     | 0.64             | 5.49 | 0.21 | -0.18 –     | 0.59             | <b>0.29</b> | -0.28       | -0.74 – 0.19     | <b>0.24</b> |
|                                   |      |       | 0.52        |                  |       | 0.43        |                  |      |      |             |                  |             |             |                  |             |
| <b>History of schistosomiasis</b> |      |       |             |                  |       |             |                  |      |      |             |                  |             |             |                  |             |
| No                                | 8.50 | Ref   |             |                  | Ref   |             |                  | 4.92 | Ref  |             |                  | Ref         |             |                  |             |
| Yes                               | 9.32 | 0.82  | 0.29 – 1.35 | <b>0.003</b>     | 0.90  | 0.35 – 1.45 | 0.001            | 6.15 | 1.23 | 0.85 – 1.60 | <b>&lt;0.001</b> | 0.77        | 0.31 – 1.22 | <b>&lt;0.001</b> |             |
|                                   |      |       |             |                  |       |             |                  |      |      |             |                  |             |             |                  |             |
| <b>Location</b>                   |      |       |             |                  |       |             |                  |      |      |             |                  |             |             |                  |             |
|                                   |      |       |             | <b>0.004</b>     |       |             | <b>0.005</b>     |      |      |             | <b>&lt;0.001</b> |             |             | <b>&lt;0.001</b> |             |
|                                   |      |       |             |                  |       |             |                  |      |      |             |                  |             |             |                  |             |
| Lambaréné                         | 9.22 | Ref   |             |                  | Ref   |             |                  | 4.78 | Ref  |             |                  | Ref         |             |                  |             |
| Zilé-PK                           | 8.07 | -1.14 | -1.78 –     | <b>&lt;0.001</b> | -1.34 | -2.11 –     | <b>&lt;0.001</b> | 6.41 | 1.62 | 1.21 – 2.03 | <b>&lt;0.001</b> | 0.77        | 0.14 – 1.41 | 0.02             |             |
|                                   |      |       | 0.51        | 1                |       | 0.57        | 1                |      |      |             | 1                |             |             |                  |             |



|        |      |      |         |      |      |             |      |      |       |              |      |       |         |   |   |       |
|--------|------|------|---------|------|------|-------------|------|------|-------|--------------|------|-------|---------|---|---|-------|
| 7 – 25 | 8.85 | 0.48 | -0.21 – | 0.17 | 0.75 | 0.04 – 1.47 | 0.04 | 5.55 | -0.06 | -0.69 – 0.57 | 0.84 | -0.87 | -1.47 – | - | - | 0.004 |
|        |      |      | 1.18    |      |      |             |      |      |       |              |      |       | 0.28    |   |   |       |

**Use private toilets at home**

|     |      |      |         |             |      |         |      |      |       |         |   |                 |       |         |       |             |
|-----|------|------|---------|-------------|------|---------|------|------|-------|---------|---|-----------------|-------|---------|-------|-------------|
| No  | 8.74 | Ref  |         |             | Ref  |         |      | 5.54 | Ref   |         |   |                 | Ref   |         |       |             |
| Yes | 9.38 | 0.64 | -0.15 – | <b>0.11</b> | 0.27 | -0.60 – | 0.55 | 4.06 | -1.48 | -2.05 – | - | <b>&lt;0.00</b> | -0.28 | -1.01 – | -0.43 | <b>0.42</b> |
|     |      |      | 1.43    |             |      | 1.14    |      |      |       | 0.90    |   | <b>1</b>        |       |         |       |             |

**Use pit latrine at home**

|     |      |       |         |             |       |         |      |      |      |             |                 |       |         |       |             |  |
|-----|------|-------|---------|-------------|-------|---------|------|------|------|-------------|-----------------|-------|---------|-------|-------------|--|
| No  | 9.11 | Ref   |         |             | Ref   |         |      | 4.79 | Ref  |             |                 |       | Ref     |       |             |  |
| Yes | 8.59 | -0.51 | -1.04 – | <b>0.06</b> | -0.21 | -0.82 – | 0.50 | 5.58 | 0.79 | 0.38 – 1.20 | <b>&lt;0.00</b> | -0.12 | -0.62 – | -0.38 | <b>0.63</b> |  |
|     |      |       | 0.01    |             |       | 0.40    |      |      |      |             | <b>1</b>        |       |         |       |             |  |

**Home proximity with water course**

|    |      |     |  |  |     |  |  |      |     |  |  |  |     |  |  |  |
|----|------|-----|--|--|-----|--|--|------|-----|--|--|--|-----|--|--|--|
| No | 8.85 | Ref |  |  | Ref |  |  | 4.96 | Ref |  |  |  | Ref |  |  |  |
|----|------|-----|--|--|-----|--|--|------|-----|--|--|--|-----|--|--|--|

|                        |      |       |                 |             |       |                 |             |      |      |                 |                  |       |                 |              |
|------------------------|------|-------|-----------------|-------------|-------|-----------------|-------------|------|------|-----------------|------------------|-------|-----------------|--------------|
| Yes                    | 8.81 | -0.03 | -0.60 –<br>0.53 | <b>0.90</b> | -0.12 | -0.73 –<br>0.49 | 0.70        | 5.55 | 0.59 | 0.19 – 0.99     | <b>0.004</b>     | 0.03  | -0.47 – 0.53    | <b>0.89</b>  |
| <b>Use fresh water</b> |      |       |                 |             |       |                 |             |      |      |                 |                  |       |                 |              |
| No                     | 9.13 | Ref   |                 |             | Ref   |                 |             | 4.43 | Ref  |                 |                  |       | Ref             |              |
| Yes                    | 8.68 | -0.45 | -1.02 –<br>0.11 | 0.11        | 0.14  | -0.56 –<br>0.84 | 0.70        | 5.79 | 1.36 | 0.97 – 1.75     | <b>&lt;0.001</b> | 0.79  | 0.21 – 1.37     | <b>0.008</b> |
| <b>Main occupation</b> |      |       |                 | <b>0.05</b> |       |                 | <b>0.12</b> |      |      |                 | <b>0.36</b>      |       |                 | <b>0.93</b>  |
| None                   | 8.45 | Ref   |                 |             | Ref   |                 |             | 5.16 | Ref  |                 |                  |       | Ref             |              |
| Student                | 9.11 | 0.65  | -0.08 –<br>1.38 | 0.08        | 0.69  | -0.13 –<br>1.52 | 0.10        | 5.61 | 0.45 | -0.22 –<br>1.12 | 0.19             | 0.20  | -0.48 – 0.88    | 0.56         |
| Farmer/Fisher          | 8.39 | -0.06 | -0.83 –<br>0.70 | 0.78        | 0.67  | -0.18 –<br>1.52 | 0.12        | 5.68 | 0.52 | -0.18 –<br>1.22 | 0.14             | -0.12 | -0.82 –<br>0.58 | 0.73         |

|        |      |      |             |      |      |             |      |      |       |         |      |       |         |      |
|--------|------|------|-------------|------|------|-------------|------|------|-------|---------|------|-------|---------|------|
| Trader | 8.62 | 0.17 | -0.97 –     | 0.77 | 0.01 | -1.12 –     | 0.98 | 5.38 | 0.22  | -0.82 – | 0.68 | -0.14 | -1.08 – | 0.76 |
|        |      |      | 1.30        |      |      | 1.14        |      |      |       | 1.26    |      |       | 0.79    |      |
| Other  | 9.41 | 0.95 | 0.17 – 1.73 | 0.02 | 0.87 | 0.08 – 1.66 | 0.03 | 5.08 | -0.08 | -0.80 – | 0.82 | -0.06 | -0.72 – | 0.84 |
|        |      |      |             |      |      |             |      |      |       | 0.63    |      |       | 0.58    |      |

\*Assessed among youg adults and adults who responded to the main study questionnaire;  $\alpha$ : Coefficient of regression estimating the difference in mark between the associated modality and the modality of reference of the variable;  $\beta$ The model of the adjusted analysis included all data considered for crude analysis
